# Supplementary material
Source: MDPI journal article supplement (https://www.mdpi.com/2073-4352/13/2/289)
Supplement: s1 [file s1]

# Unprecedented coordination compounds with 4,4'-diaminodiphenylethane as a supramolecular agent and ditopic ligand: synthesis, crystal structures and Hirshfeld surface analysis

Nicoleta Craciun<sup>1,2</sup>, Diana Chisca<sup>1,2</sup>, Elena Melnic<sup>1</sup> and Marina S. Fonari<sup>1,\*</sup>

<sup>1</sup> Institute of Applied Physics USM, Academiei Str. 5, MD-2028 Chisinau, Moldova

<sup>2</sup> Faculty of Biology and Chemistry Ion Creangă State Pedagogical University, Ion Creangă Str. 1, MD-2069 Chisinau, Moldova

\* Correspondence: marina.fonari@ifa.md or fonari.xray@gmail.com

Table S1. Selected geometric parameters in 1-7.

| Parameter                     | Value      | Parameter               | Value      |
|-------------------------------|------------|-------------------------|------------|
| <b>1</b>                      |            |                         |            |
| Cd(1)-N(5)                    | 2.324(3)   | Cd(1)-N(4)              | 2.369(3)   |
| Cd(1)-N(3)                    | 2.347(3)   | Cd(1)-N(2)              | 2.371(3)   |
| Cd(1)-N(1)                    | 2.356(3)   | Cd(1)-N(6)              | 2.379(3)   |
| N(5)-Cd(1)-N(3)               | 94.51(11)  | N(3)-Cd(1)-N(2)         | 94.38(11)  |
| N(5)-Cd(1)-N(1)               | 154.13(10) | N(1)-Cd(1)-N(2)         | 69.99(10)  |
| N(3)-Cd(1)-N(1)               | 107.41(11) | N(4)-Cd(1)-N(2)         | 153.26(12) |
| N(5)-Cd(1)-N(4)               | 107.80(11) | N(5)-Cd(1)-N(6)         | 70.25(11)  |
| N(3)-Cd(1)-N(4)               | 71.08(11)  | N(1)-Cd(1)-N(6)         | 94.04(11)  |
| N(1)-Cd(1)-N(4)               | 92.52(11)  | N(4)-Cd(1)-N(6)         | 91.29(11)  |
| N(5)-Cd(1)-N(2)               | 95.32(11)  | N(2)-Cd(1)-N(6)         | 109.45(11) |
| N(3)-Cd(1)-N(6)               | 152.40(12) |                         |            |
| <b>2</b>                      |            |                         |            |
| Ni(1)-O(1w)                   | 2.046(2)   | Ni(1)-N(1)              | 2.143(3)   |
| Ni(1)-O(2w)                   | 2.046(2)   |                         |            |
| O(1w)-Ni(1)-O(2w)             | 88.88(11)  | O(1w)-Ni(1)-N(1)        | 93.44(11)  |
| O(2w)-Ni(1)-N(1)              | 89.23(11)  |                         |            |
| <b>3</b>                      |            |                         |            |
| Zn(1)-O(4)                    | 2.083(2)   | Zn(1)-O(1)              | 2.132(3)   |
| Zn(1)-N(4)                    | 2.101(3)   | Zn(1)-O(2)              | 2.350(3)   |
| Zn(1)-O(5)                    | 2.114(2)   | Zn(1)-N(5) <sup>a</sup> | 2.086(3)   |
| O(4)-Zn(1)-N(4)               | 91.06(11)  | N(4)-Zn(1)-O(5)         | 87.04(11)  |
| O(4)-Zn(1)-O(5)               | 176.04(10) | O(4)-Zn(1)-O(1)         | 90.21(11)  |
| N(4)-Zn(1)-O(1)               | 105.03(12) | O(5)-Zn(1)-O(1)         | 86.93(11)  |
| O(4)-Zn(1)-O(2)               | 85.59(11)  | N(4)-Zn(1)-O(2)         | 161.70(12) |
| O(5)-Zn(1)-O(2)               | 95.14(11)  | O(1)-Zn(1)-O(2)         | 57.08(11)  |
| N(5) <sup>a</sup> -Zn(1)-N(4) | 106.62(12) |                         |            |
| <sup>a</sup> x, -y+1/2, z+1/2 |            |                         |            |
| <b>4</b>                      |            |                         |            |
| Cd(1)-N(3)                    | 2.345(5)   | Cd(1)-N(4)              | 2.365(5)   |
| Cd(1)-N(1)                    | 2.356(5)   | Cd(1)-N(5)              | 2.371(5)   |
| Cd(1)-N(6)                    | 2.359(4)   |                         |            |

|                                                       |            |                               |            |
|-------------------------------------------------------|------------|-------------------------------|------------|
| N(3)-Cd(1)-N(1)                                       | 83.4(2)    | N(6)-Cd(1)-N(2)               | 97.7(2)    |
| N(3)-Cd(1)-N(6)                                       | 165.3(2)   | N(4)-Cd(1)-N(2)               | 160.4(2)   |
| N(1)-Cd(1)-N(6)                                       | 93.0(2)    | N(3)-Cd(1)-N(5)               | 90.9(2)    |
| N(3)-Cd(1)-N(4)                                       | 70.6(2)    | N(1)-Cd(1)-N(5)               | 164.9(2)   |
| N(1)-Cd(1)-N(4)                                       | 94.4(2)    | N(6)-Cd(1)-N(5)               | 95.8(2)    |
| N(6)-Cd(1)-N(4)                                       | 95.5(2)    | N(4)-Cd(1)-N(5)               | 96.9(2)    |
| N(3)-Cd(1)-N(2)                                       | 94.5(2)    | N(2)-Cd(1)-N(5)               | 96.1(2)    |
| N(1)-Cd(1)-N(2)                                       | 70.6(2)    |                               |            |
| <b>5</b>                                              |            |                               |            |
| Cd(1)-O(1)                                            | 2.303(2)   | Cd(1)-N(2)                    | 2.360(3)   |
| Cd(1)-N(1)                                            | 2.365(2)   | Cd(1)-N(3) <sup>b</sup>       | 2.316(3)   |
| O(1)-Cd(1)-O(1) <sup>a</sup>                          | 173.51(12) | O(1)-Cd(1)-N(3) <sup>b</sup>  | 86.75(6)   |
| O(1)-Cd(1)-N(2)                                       | 93.25(6)   | O(1)-Cd(1)-N(1) <sup>a</sup>  | 91.40(8)   |
| O(1)-Cd(1)-N(1)                                       | 89.20(8)   | N(3) <sup>b</sup> -Cd(1)-N(1) | 95.28(6)   |
| N(2)-Cd(1)-N(1)                                       | 84.72(6)   | N(1) <sup>a</sup> -Cd(1)-N(1) | 169.45(11) |
| <sup>a</sup> -x+1, y, -z+1/2; <sup>b</sup> x, y+1, z  |            |                               |            |
| <b>6</b>                                              |            |                               |            |
| Co(1)-O(1w)                                           | 2.058(2)   | Co(1)-N(1)                    | 2.223(2)   |
| Co(1)-N(2)                                            | 2.168(3)   | Co(1)-N(3)#2                  | 2.185(3)   |
| O(1w)-Co(1)-O(1w) <sup>a</sup>                        | 174.27(10) | N(1) <sup>a</sup> -Co(1)-N(1) | 170.55(10) |
| O(1w)-Co(1)-N(2)                                      | 87.14(5)   | N(2)-Co(1)-N(1)               | 94.72(5)   |
| O(1w)-Co(1)-N(3) <sup>b</sup>                         | 92.86(5)   | N(2)-Co(1)-N(3) <sup>b</sup>  | 180.0      |
| O(1w)-Co(1)-N(1)                                      | 89.62(8)   | N(3) <sup>b</sup> -Co(1)-N(1) | 85.28(5)   |
| <sup>a</sup> -x+1, y, -z+1/2; <sup>b</sup> x, y-1, z; |            |                               |            |
| <b>7</b>                                              |            |                               |            |
| Cd(1)-N(1)                                            | 2.267(2)   | Cd(1)-O(2)                    | 2.308(2)   |
| Cd(1)-C(8)                                            | 2.753(2)   | Cd(1)-O(1)                    | 2.464(2)   |
| N(1) <sup>a</sup> -Cd(1)-N(1)                         | 111.89(11) | O(2)-Cd(1)-O(1)               | 53.51(7)   |
| N(1)-Cd(1)-O(2)                                       | 132.13(8)  | N(1)-Cd(1)-C(8)               | 100.83(7)  |
| O(1)-Cd(1)-C(8)                                       | 146.06(8)  | N(1)-Cd(1)-O(1)               | 84.14(7)   |
| O(2)-Cd(1)-C(8)                                       | 103.82(7)  |                               |            |
| <sup>a</sup> -x, y, -z+1/2                            |            |                               |            |

**Table S2. Hydrogen bonds for 1-7. [Å and °].**

| D-H...A            | d(D-H) | d(H...A) | d(D...A)  | ∠(DHA) | Symmetry transformations for acceptor |
|--------------------|--------|----------|-----------|--------|---------------------------------------|
| <b>1</b>           |        |          |           |        |                                       |
| C(24)-H(24)...O(2) | 0.93   | 2.56     | 3.390(6)  | 149.2  | -x+1, -y+1, -z                        |
| C(21)-H(21)...O(6) | 0.93   | 2.53     | 3.279(13) | 137.8  | -x+1, -y+1, -z+1                      |
| C(17)-H(17)...O(6) | 0.93   | 2.50     | 3.405(16) | 163.1  | x+1, y+1, z                           |
| C(7)-H(7)...O(4)   | 0.93   | 2.51     | 3.396(6)  | 159.2  | x, y, z                               |
| <b>2</b>           |        |          |           |        |                                       |
| N(1)-H(1C)...O(4)  | 0.89   | 2.26     | 3.105(7)  | 158.7  | x, -y+3/2, z+1/2                      |
| N(1)-H(1C)...O(3)  | 0.89   | 2.40     | 3.224(13) | 153.9  | -x+2, y+1/2, -z+3/2                   |
| N(1)-H(1D)...O(1)  | 0.89   | 2.29     | 3.100(6)  | 151.8  | -x+2, -y+1, -z+1                      |
| N(1)-H(1D)...O(2)  | 0.89   | 2.33     | 3.119(7)  | 148.4  | x, y, z                               |
| N(2)-(2N)...O(3w)  | 0.86   | 2.35     | 3.119(6)  | 147.6  | x, -y+3/2, z+1/2                      |

|                      |         |         |           |        |                       |
|----------------------|---------|---------|-----------|--------|-----------------------|
| O(1w)-H(1w1)···O(2)  | 0.81(2) | 2.25(4) | 2.813(8)  | 127(4) | -x+2, -y+1, -z+2      |
| O(1w)-H(1w1)···O(4)  | 0.81(2) | 1.96(2) | 2.739(6)  | 159(4) | x, y, z+1             |
| O(1w)-H(2w1)···O(3w) | 0.85(2) | 1.88(2) | 2.713(4)  | 168(4) | -x+1, y-1/2, -z+3/2   |
| O(2w)-H(1w2)···O(2)  | 0.85(2) | 1.79(3) | 2.606(7)  | 161(5) | -x+2, y-1/2, -z+3/2   |
| O(2w)-H(1w2)···O(3)  | 0.85(2) | 1.98(2) | 2.790(10) | 159(4) | x, -y+1/2, z+1/2      |
| O(2w)-H(2w2)···O(1)  | 0.82(2) | 1.91(2) | 2.688(6)  | 160(4) | -x+2, -y+1, -z+1      |
| O(2w)-H(2w2)···O(3)  | 0.82(2) | 2.30(3) | 3.086(15) | 160(4) | x, y, z               |
| O(3w)-H(1w3)···N(2)  | 0.87(2) | 2.05(3) | 2.849(5)  | 152(5) | x, y, z               |
| O(3w)-H(2w3)···O(1)  | 0.87(2) | 1.91(2) | 2.775(8)  | 172(5) | x-1, y, z             |
| O(3w)-H(2w3)···O(3)  | 0.87(2) | 2.11(3) | 2.841(12) | 141(4) | -x+1, -y+1, -z+1      |
| <b>3</b>             |         |         |           |        |                       |
| N(4)-H(4A)···O(7)    | 0.89    | 2.08    | 2.935(4)  | 159.8  | x, y, z               |
| N(4)-H(4B)···O(8)    | 0.89    | 2.08    | 2.970(5)  | 174.9  | -x+1/2, y-1/2, z      |
| N(5)-H(5A)···O(8)    | 0.89    | 2.09    | 2.940(4)  | 159.6  | x, -y+3/2, z-1/2      |
| N(5)-H(5B)···O(7)    | 0.89    | 2.08    | 2.967(5)  | 170.7  | -x+1/2, -y+1, z-1/2   |
| C(2)-H(2C)···O(6)    | 0.96    | 2.48    | 3.356(6)  | 151.2  | x, y-1, z             |
| <b>4</b>             |         |         |           |        |                       |
| N(5)-H(5A)···O(2)    | 0.89    | 2.01    | 2.87(3)   | 162.6  | x, -y+3/2, z+1/2      |
| N(5)-H(5A)···O(2A)   | 0.89    | 2.27    | 3.14(3)   | 165.7  | x, -y+3/2, z+1/2      |
| N(5)-H(5B)···O(6)    | 0.89    | 2.29    | 3.159(7)  | 165.5  | -x, y+1/2, -z+3/2     |
| N(6)-H(6A)···O(3)    | 0.89    | 2.27    | 3.13(3)   | 164.5  | x, -y+3/2, z+1/2      |
| N(6)-H(6A)···O(3A)   | 0.89    | 2.02    | 2.87(2)   | 160.1  | x, -y+3/2, z+1/2      |
| N(6)-H(6B)···O(7)    | 0.89    | 2.29    | 3.156(7)  | 163.4  | -x+1, y+1/2, -z+3/2   |
| C(1)-H(1)···O(8)     | 0.93    | 2.58    | 3.414(10) | 149.4  | -x+1, y+1/2, -z+3/2   |
| C(9)-H(9)···O(1A)    | 0.93    | 2.42    | 3.133(11) | 133.0  | -x, -y+1, -z+1        |
| C(14)-H(14)···O(8)   | 0.93    | 2.50    | 3.369(10) | 155.9  | x, -y+3/2, z+1/2      |
| C(19)-H(19)···O(4)   | 0.93    | 2.48    | 3.18(2)   | 131.8  | -x+1, -y+2, -z+1      |
| <b>5</b>             |         |         |           |        |                       |
| O(1)-H(1w)···N(4)    | 0.87(2) | 1.90(2) | 2.770(4)  | 176(3) | x, y, z               |
| O(1)-H(2w)···O(2)    | 0.87(2) | 1.98(2) | 2.842(9)  | 177(4) | x, y, z               |
| N(4)-H(1N4)···O(3)   | 0.85(2) | 2.27(2) | 3.110(9)  | 172(5) | -x+1/2, y+1/2, -z+1/2 |
| N(4)-H(2N4)···O(1SS) | 0.87(2) | 2.19(3) | 2.989(13) | 151(4) | -x+1/2, -y+1/2, -z+1  |
| <b>6</b>             |         |         |           |        |                       |
| O(1w)-H(1w1)···F(1)  | 0.86(2) | 1.92(2) | 2.771(9)  | 167(3) | x, y-1, z             |
| O(1w)-H(2w1)···F(1B) | 0.86(2) | 2.24(3) | 3.07(2)   | 161(3) | x, y-1, z             |
| O(1w)-H(1w1)···F(4B) | 0.86(2) | 2.28(3) | 3.002(11) | 142(3) | x, y-1, z             |
| O(1w)-H(2w1)···N(4)  | 0.84(2) | 1.92(2) | 2.730(4)  | 167(3) | x, y, z               |
| N(4)-H(1N)···O(1S)   | 0.88(2) | 2.40(3) | 3.20(2)   | 151(4) | x, y, z               |
| N(4)-H(1N)···O(2S)   | 0.88(2) | 2.07(2) | 2.893(8)  | 154(4) | x, y, z               |
| N(4)-H(2N)···F(4)    | 0.85(2) | 2.20(2) | 3.022(10) | 164(4) | -x+3/2, y-1/2, -z+1/2 |
| N(4)-H(2N)···F(3B)   | 0.85(2) | 2.47(3) | 3.29(2)   | 162(4) | -x+3/2, y-1/2, -z+1/2 |
| C(17)-H(17)···F(2)   | 0.93    | 2.55    | 3.457(11) | 163.8  | -x+3/2, y-1/2, -z+1/2 |
| C(17)-H(17)···F(4B)  | 0.93    | 2.50    | 3.371(10) | 156.6  | -x+3/2, y-1/2, -z+1/2 |
| O(1S)-H(1S)···F(2)   | 0.82    | 2.25    | 2.94(2)   | 141.7  | x, y-1, z             |
| <b>7</b>             |         |         |           |        |                       |
| N(1)-H(1N)···O(2)    | 0.84(2) | 2.07(2) | 2.884(3)  | 166(3) | -x, y+1, -z+1/2       |
| N(1)-H(2N)···O(4)    | 0.86(2) | 2.14(2) | 2.953(3)  | 159(3) | x, -y+1, z-1/2        |
| O(3)-H(1O)···O(1)    | 0.82    | 1.78    | 2.602(3)  | 174.4  | x, -y+1, z+1/2        |

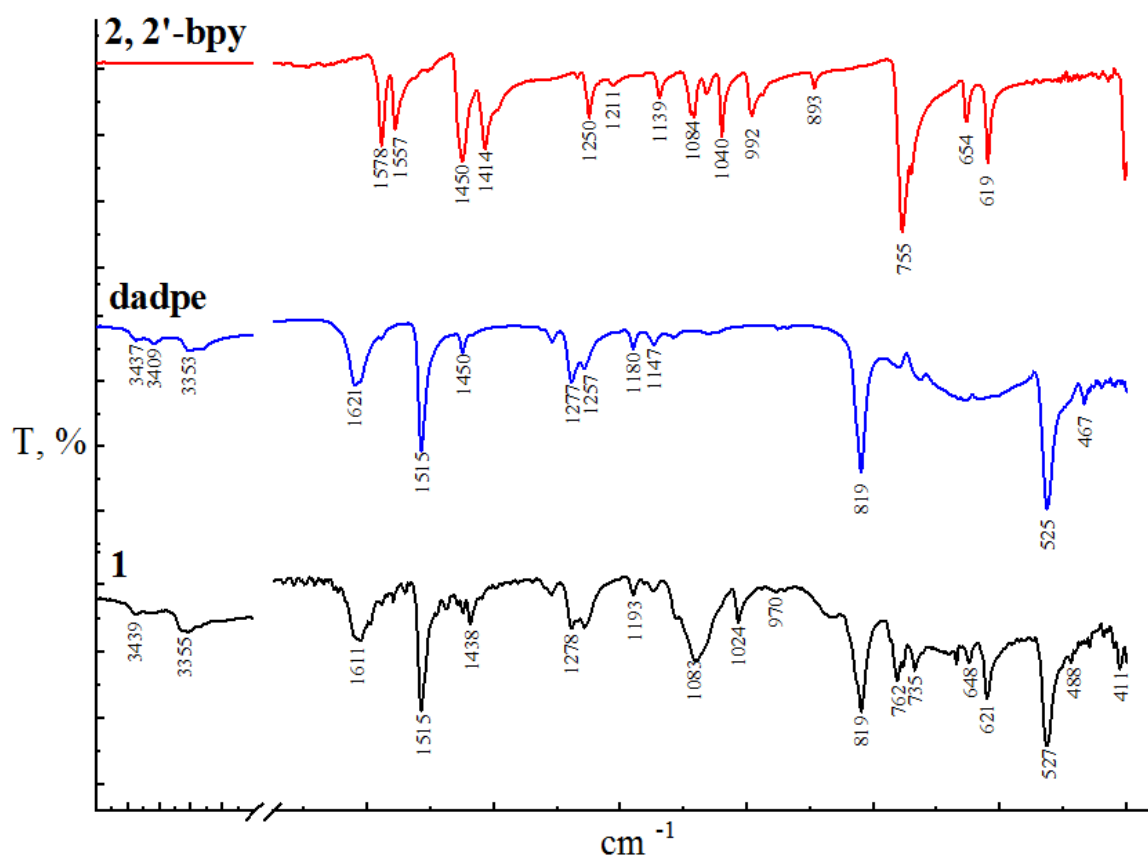

**Figure S1.** IR spectra for [Cd(2,2'-bpy)<sub>3</sub>](ClO<sub>4</sub>)<sub>2</sub>(dadpe)(4,4'-bpy) (**1**) and starting ligands

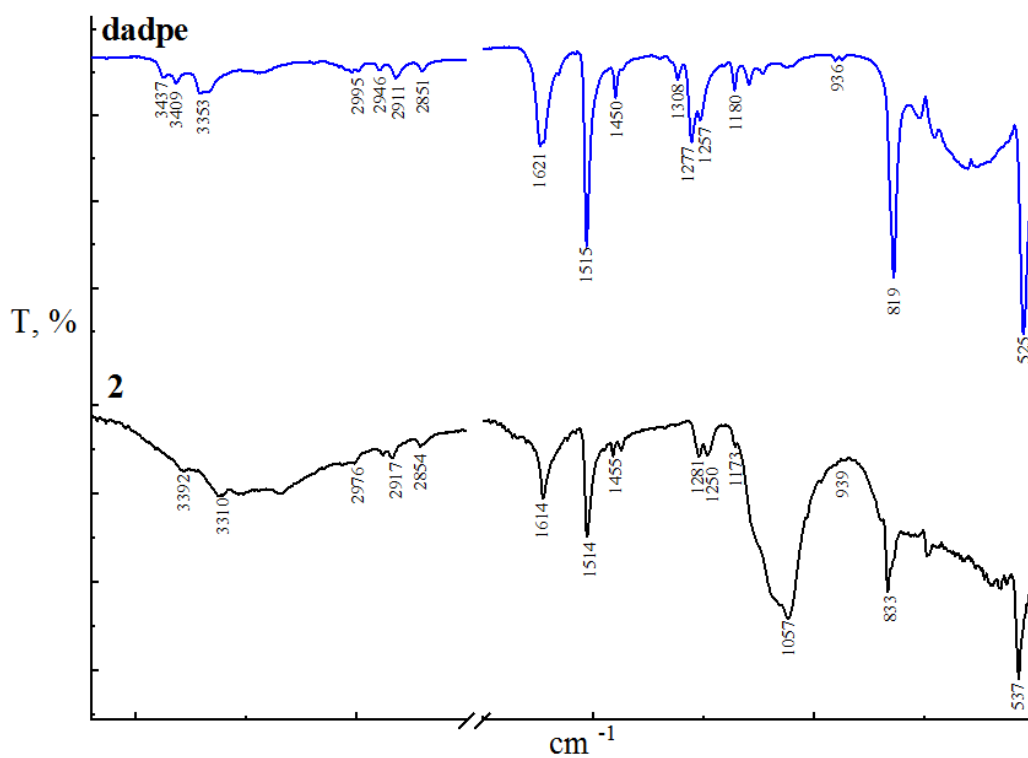

**Figure S2.** IR spectra for [Ni(dadpe)<sub>2</sub>(H<sub>2</sub>O)<sub>4</sub>](SO<sub>4</sub>)·H<sub>2</sub>O (**2**) and dadpe ligand

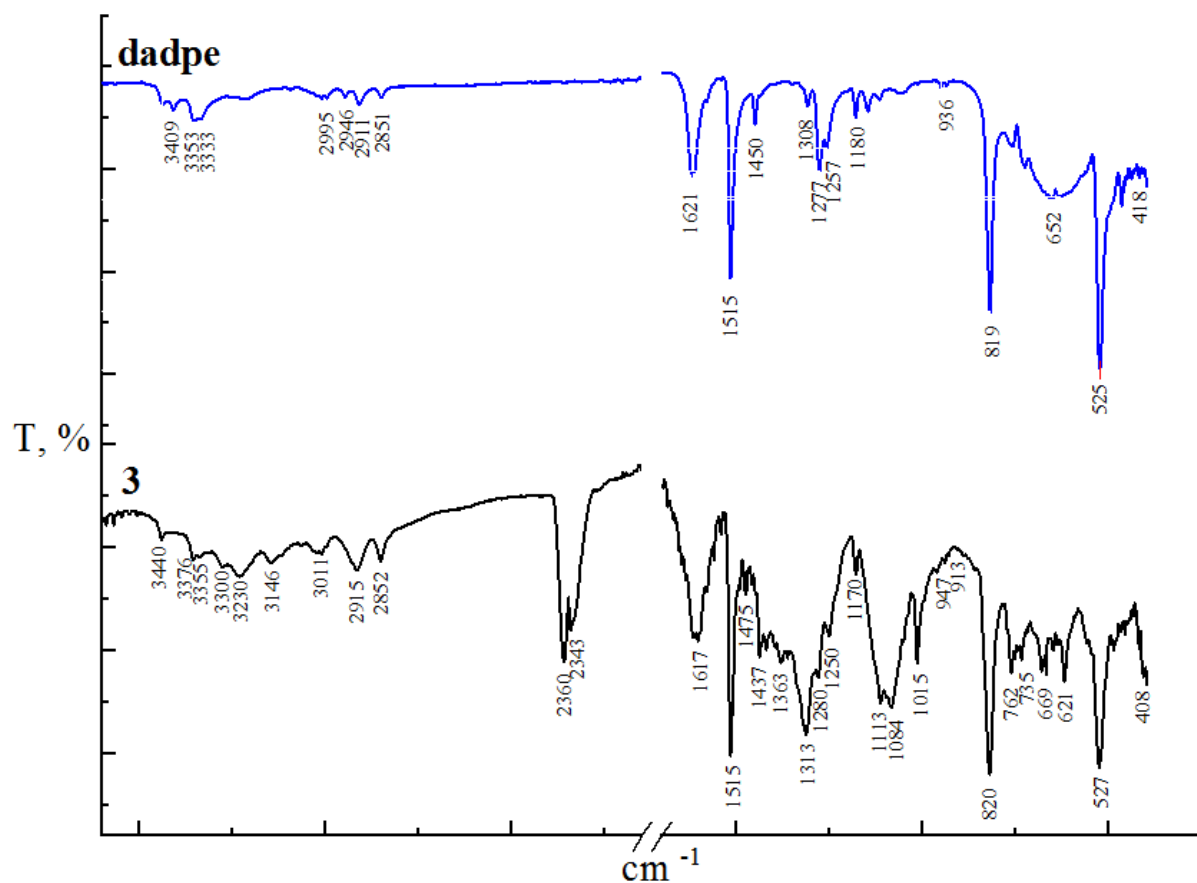

**Figure S3.** IR spectra for  $\{[\text{Zn}(\text{NO}_3)(\text{dadpe})(\text{dmf})_2](\text{NO}_3)\}_n$  (**3**) and dadpe ligand

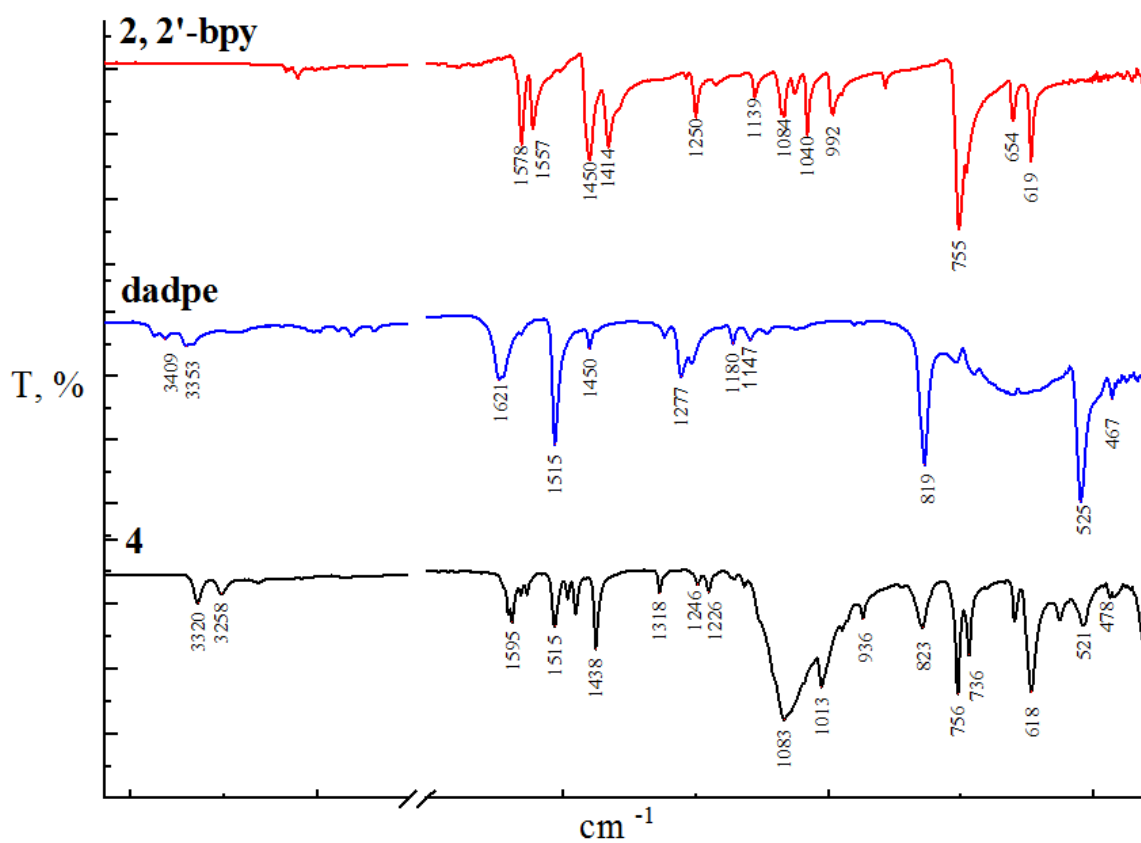

**Figure S4.** IR spectra for  $\{[\text{Cd}(2,2'\text{-bpy})_2(\text{dadpe})](\text{ClO}_4)_2\}_n$  (**4**) and ligands

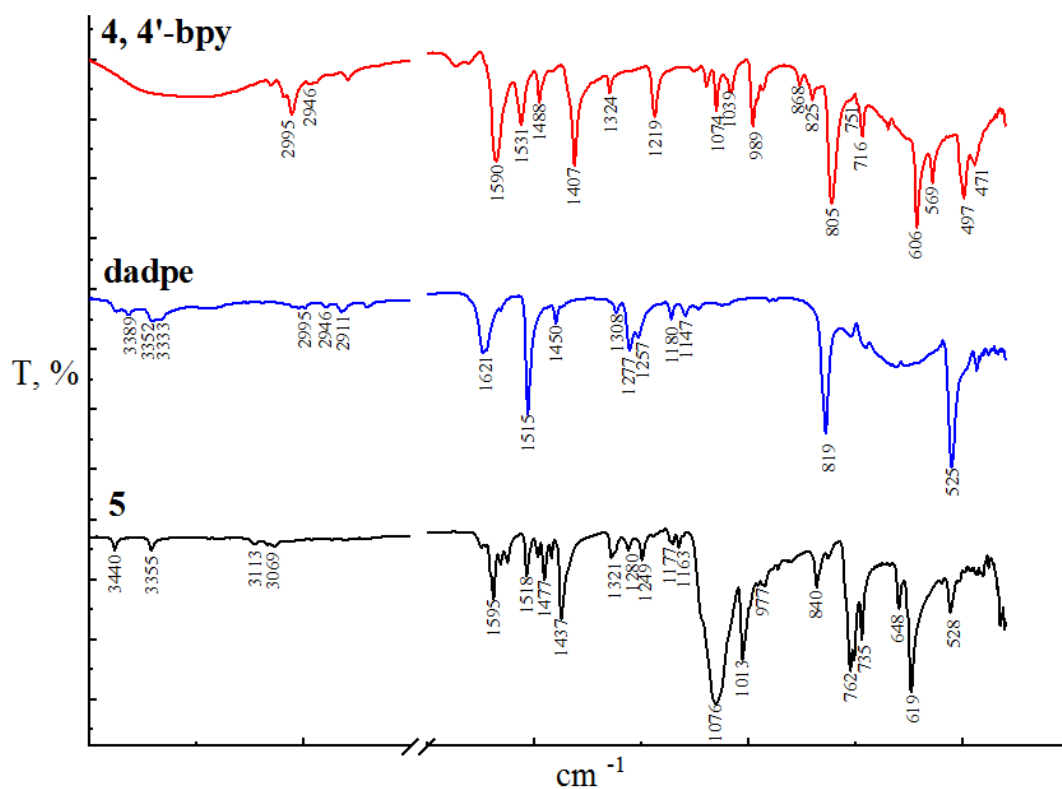

**Figure S5.** IR spectra for {[Cd(4,4'-bpy)<sub>2</sub>(H<sub>2</sub>O)<sub>2</sub>](ClO<sub>4</sub>)<sub>2</sub>(dadpe)(EtOH)<sub>2</sub>]<sub>n</sub> (**5**) and ligands

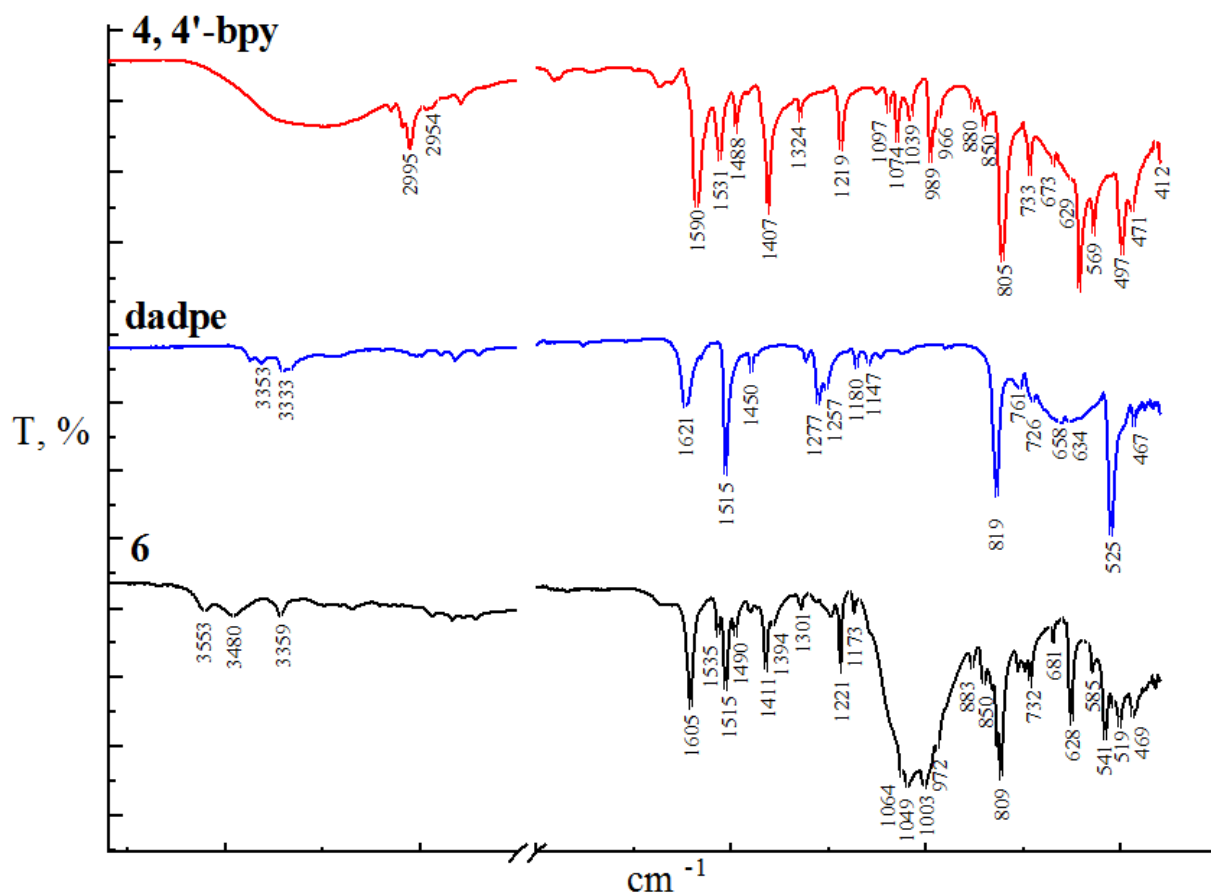

**Figure S6.** IR spectra for {[Co(4,4'-bpy)<sub>2</sub>(H<sub>2</sub>O)<sub>2</sub>](BF<sub>4</sub>)<sub>2</sub>(dadpe)(EtOH)<sub>2</sub>]<sub>n</sub> (**6**) and ligands

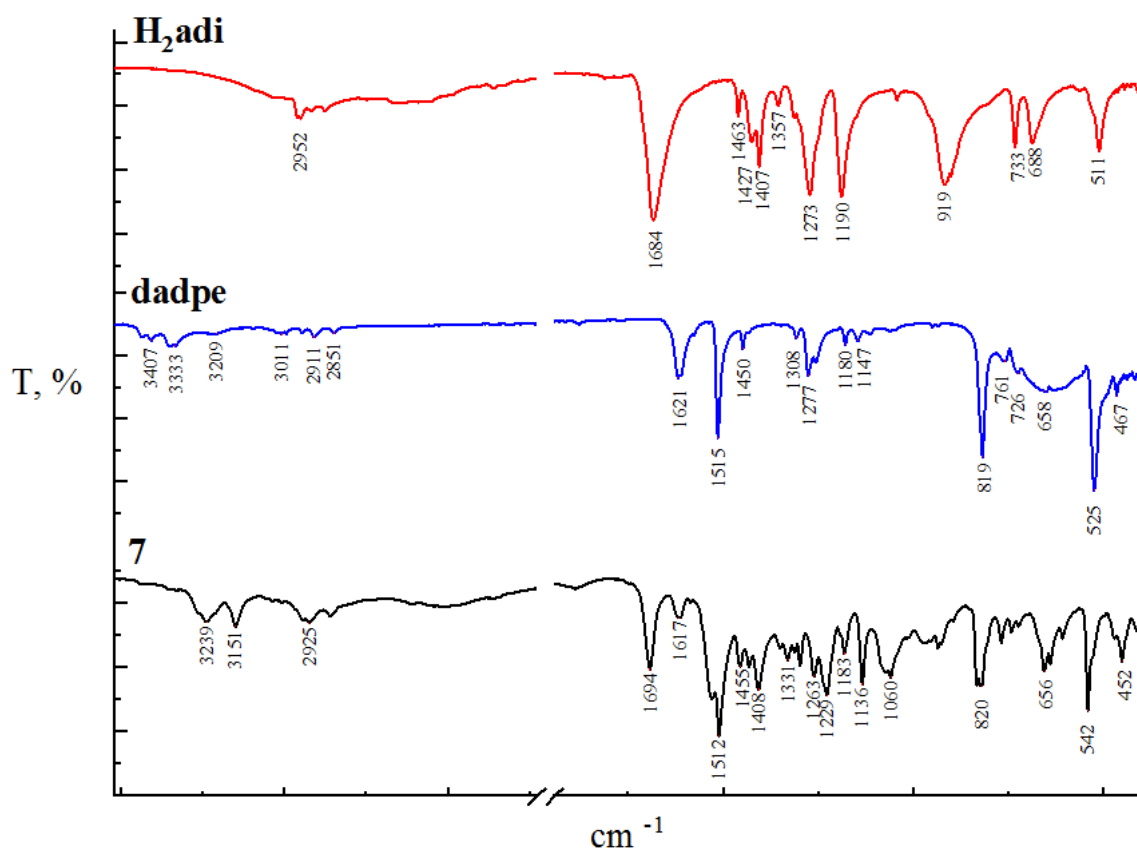

**Figure S7.** IR spectra for  $\{[\text{Cd}(\text{adi})(\text{dadpe})](\text{H}_2\text{adi})\}_n$  (**7**) and ligands

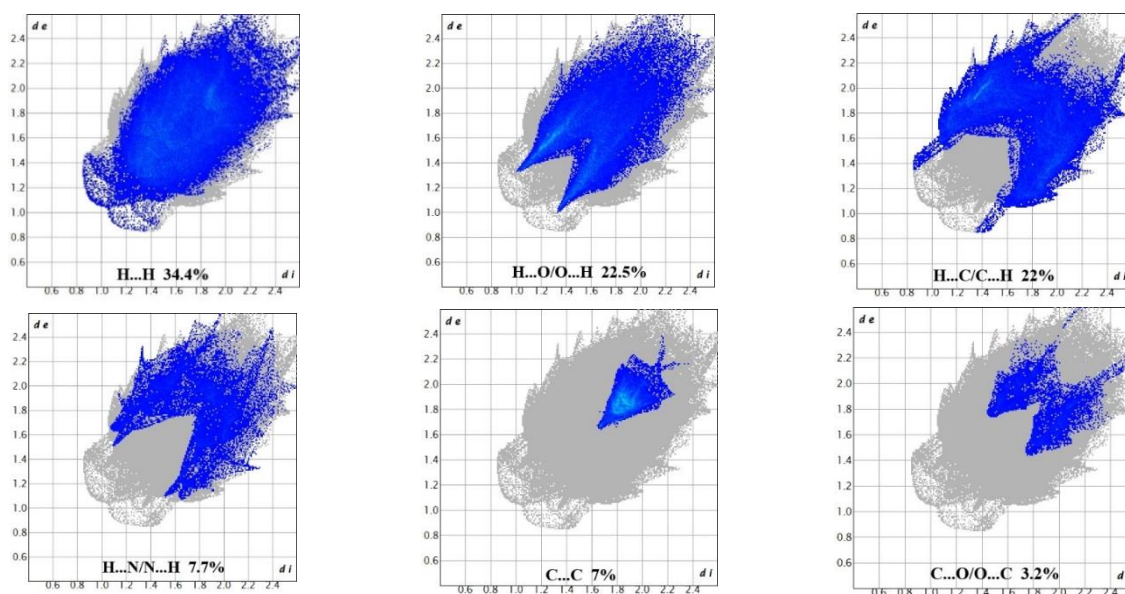

**Figure S8.** 2D fingerprint plots of contacts in **1**

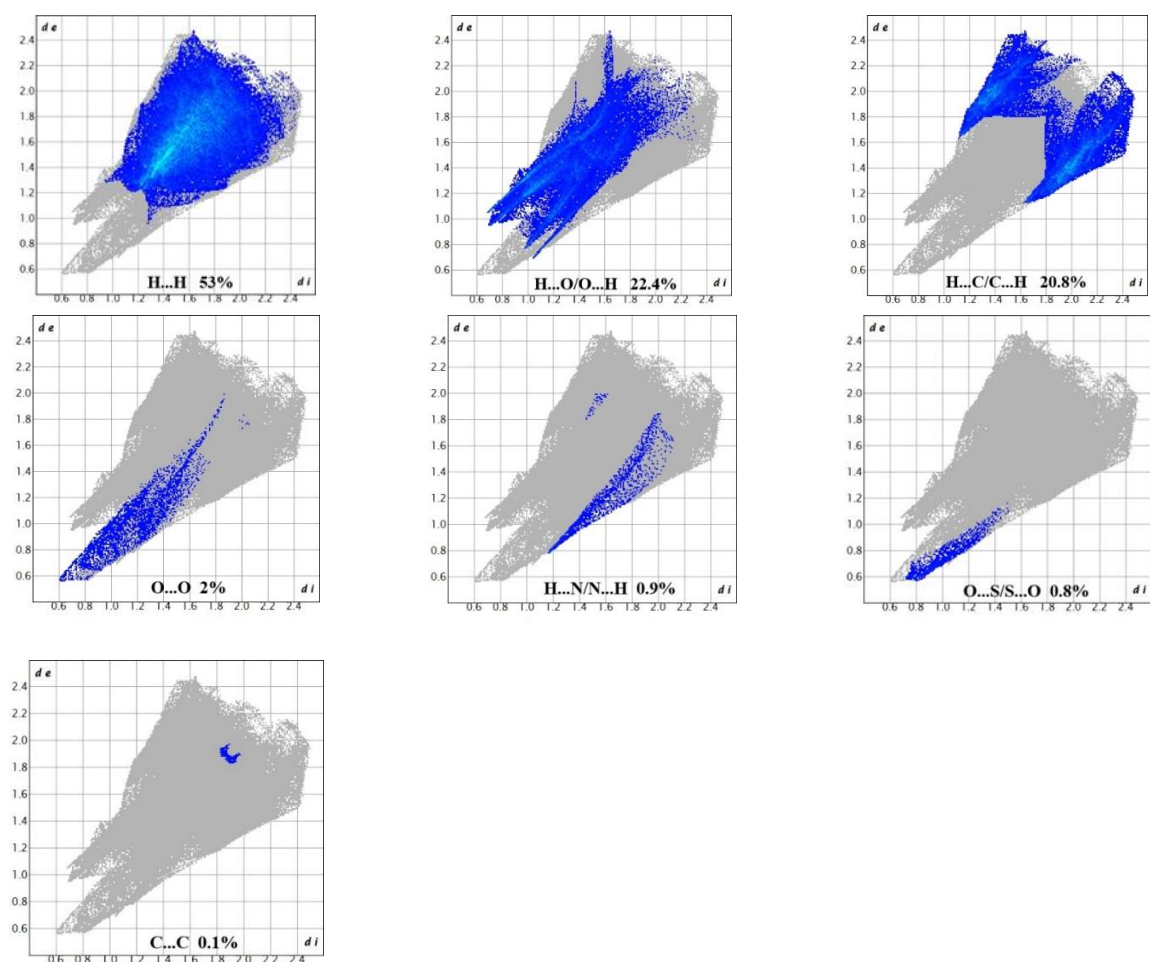

**Figure S9.** 2D fingerprint plots of contacts in 2

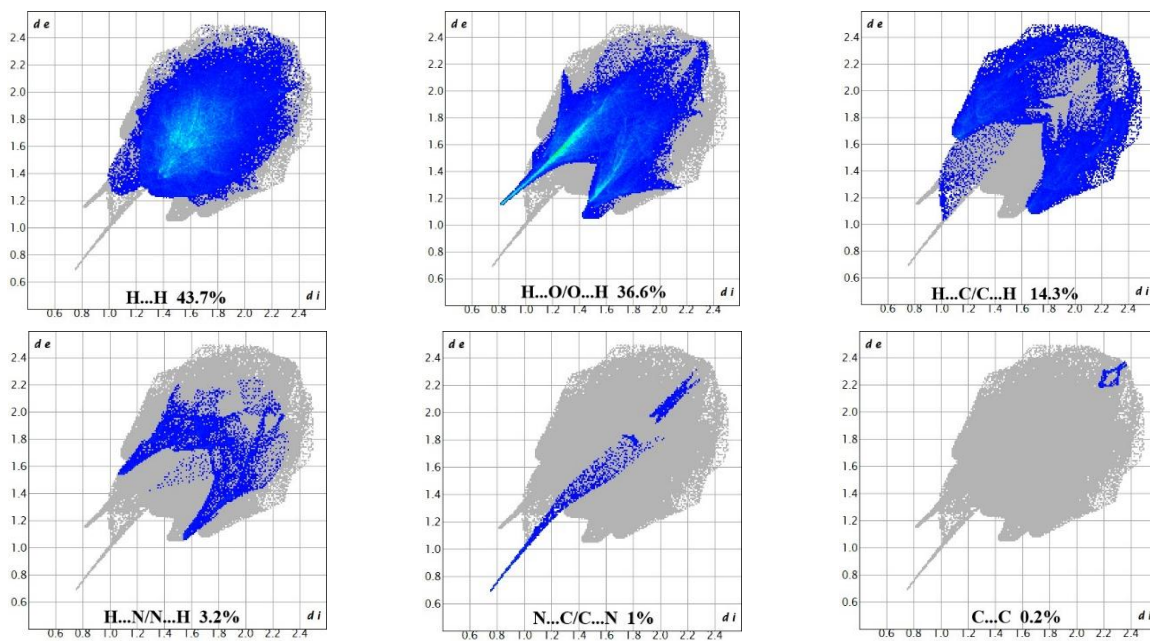



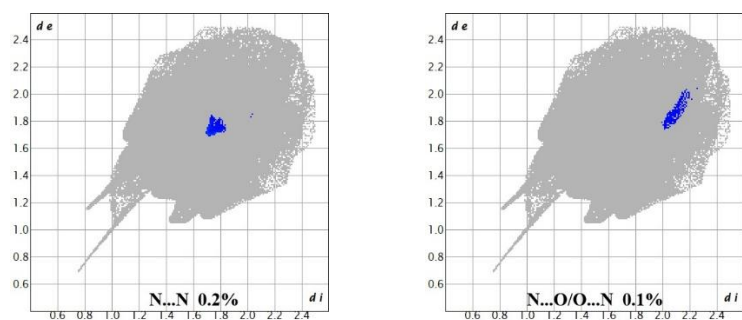

**Figure S10.** 2D fingerprint plots of contacts in 3

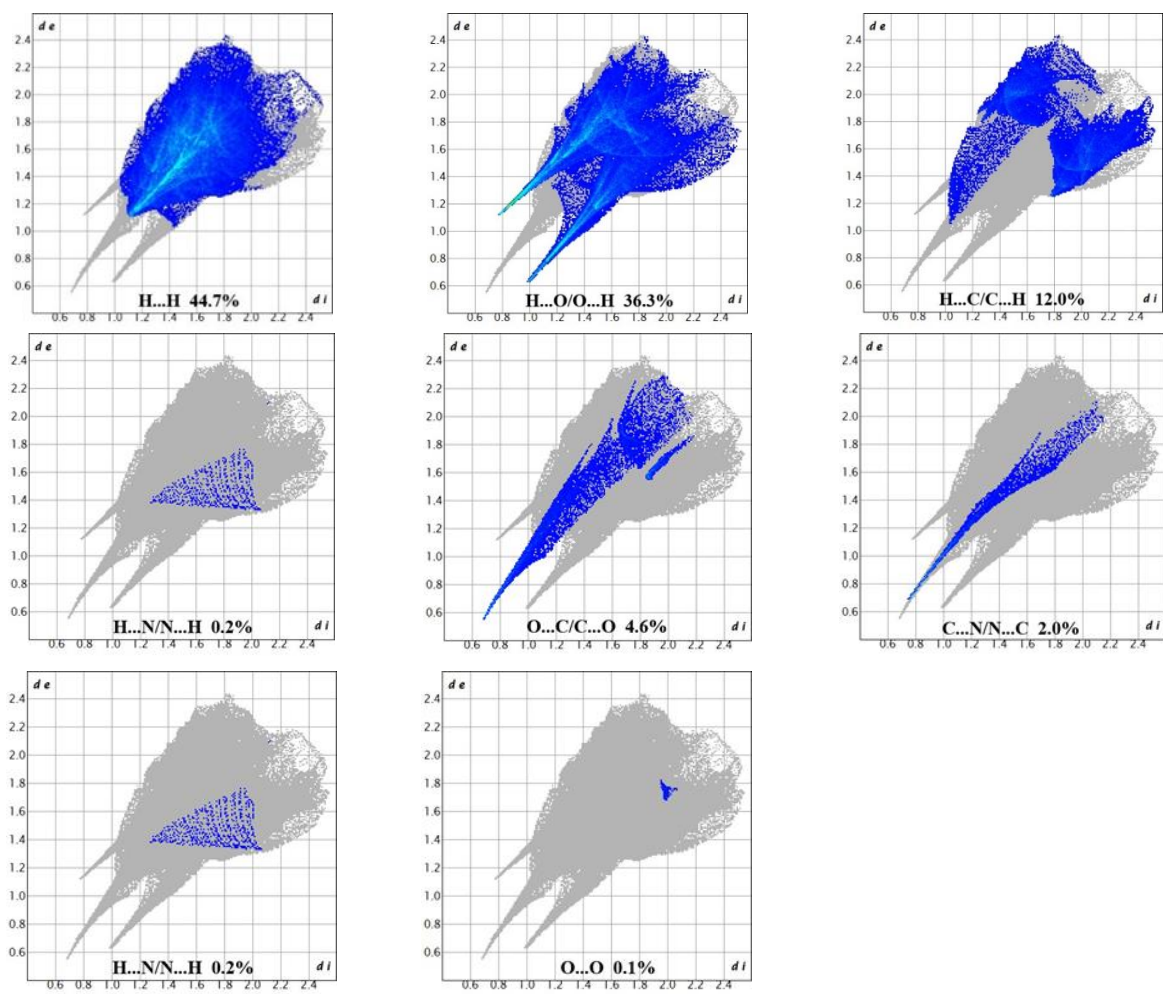

**Figure S11.** 2D fingerprint plots of contacts in 7
